# Supplementary material for: Construction of hydrophilic covalent organic frameworks and their fast and efficient adsorption of cationic dyes from aqueous solution
Source: Royal Society of Chemistry journal article supplement (doi:10.1039/d2nj04336j), 2022-01-01
Supplement: d2nj04336j1.pdf [file d2nj04336j1.pdf]

### Procedure of the repeatability analysis of TFPB-Pa-SO<sub>3</sub>H COF and TFPB-BDSA COF

To aqueous dye solution (20 mg·L<sup>-1</sup>, 10 mL) were added 5 mg of TFPB-Pa-SO<sub>3</sub>H COF and TFPB-BDSA COF, and the mixture was stirred for 24 hours at room temperature. After the adsorption is completed, the adsorbent is separated by centrifugation and dried for later use. The mixture was then washed with HCl (mg·L<sup>-1</sup>) in ethanol as the eluent and stirred at room temperature with dye-adsorbed TFPB-Pa-SO<sub>3</sub>H COF and TFPB-BDSA COF for 2 h for the dye desorption experiment. The adsorbent was collected by filtration and dried at 100°C for 6 hours. The above experimental steps were repeated 5 times.

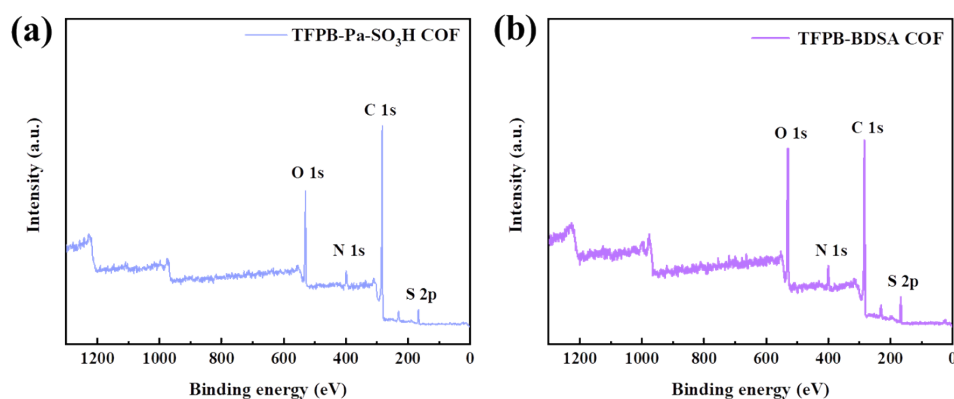

Fig. S1 XPS fully scanned spectra of TFPB-Pa-SO<sub>3</sub>H COF (a) and TFPB-BDSA COF (b).

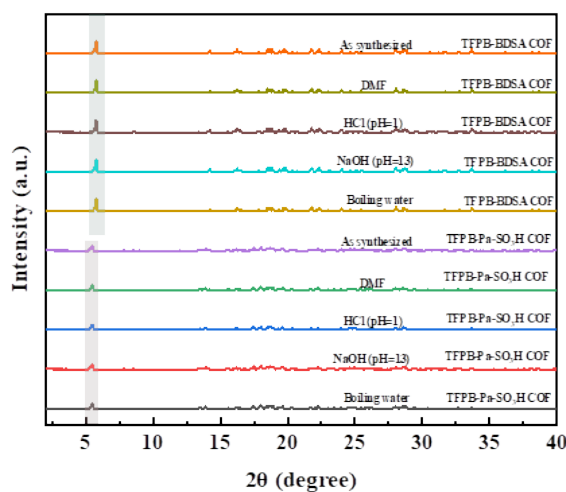

Fig. S2 PXRD patterns of TFPB-Pa-SO<sub>3</sub>H COF and TFPB-BDSA COF treated with different conditions.

**Table S1** The binding energies and relative element contents for TFPB-Pa-SO<sub>3</sub>H COF and TFPB-BDSA COF.

|      | TFPB-Pa-SO <sub>3</sub> H COF |           | TFPB-BDSA COF  |           |
|------|-------------------------------|-----------|----------------|-----------|
|      | Binding energy                | Atomic(%) | Binding energy | Atomic(%) |
| N 1s | 398.50                        | 5.96      | 400.00         | 5.81      |
| C 1s | 283.27                        | 75.95     | 283.79         | 67.17     |
| O 1s | 530.21                        | 14.77     | 530.54         | 21.71     |
| S 2p | 166.37                        | 3.32      | 167.04         | 5.31      |

**Table S2** The adsorption capacities of different adsorbents and prepared in this work for some dyes.

| Adsorbents                    | Dyes                          | $q_e$ (mg·g <sup>-1</sup> ) | Reference |
|-------------------------------|-------------------------------|-----------------------------|-----------|
| Acid-Functionalized Bentonite | MB                            | 266                         | [46]      |
| MoS <sub>2</sub>              | RhB                           | 291                         | [47]      |
| AA2-alk-MXene adsorbent       | MB                            | 193                         | [48]      |
| CoF/GO                        | MB                            | 157                         | [49]      |
| Benzodimidazole-COF           | MB                            | 185                         | [50]      |
| COF-TPDD-COOH                 | CV                            | 88                          | [51]      |
|                               | MLB                           | 1174                        |           |
|                               | TFPB-Pa-SO <sub>3</sub> H COF | CV                          | 1559      |
| TFPB-BDSA COF                 | RhB                           | 1062                        |           |
|                               | MLB                           | 1166                        |           |
|                               | CV                            | 1288                        | This work |
|                               | RhB                           | 1054                        |           |

**Table S3** Detection of MLB, RhB and CV on TFPB-Pa-SO<sub>3</sub>H COF in Real Samples.

| Real water samples    | Dyes  | Added (ug·mL <sup>-1</sup> ) | Calculated (ug·mL <sup>-1</sup> ) | Recovery (%) | RSD (n=3) |
|-----------------------|-------|------------------------------|-----------------------------------|--------------|-----------|
| Industrial wastewater | MLB   | 0.90                         | 0.940                             | 104.40       | 4.7       |
|                       |       | 0.50                         | 0.489                             | 97.80        | 4.4       |
|                       |       | 0.060                        | 0.053                             | 87.72        | 3.5       |
|                       | RhB   | 0.90                         | 0.934                             | 103.78       | 4.5       |
|                       |       | 0.50                         | 0.507                             | 101.40       | 4.4       |
|                       |       | 0.060                        | 0.054                             | 90.00        | 3.1       |
|                       | CV    | 0.90                         | 0.846                             | 94.74        | 3.2       |
|                       |       | 0.50                         | 0.465                             | 93.63        | 3.7       |
|                       |       | 0.060                        | 0.056                             | 93.34        | 3.6       |
| MLB                   | 0.90  | 0.812                        | 90.22                             | 3.2          |           |
|                       | 0.50  | 0.444                        | 88.80                             | 2.9          |           |
|                       | 0.060 | 0.053                        | 88.33                             | 2.6          |           |
| Tap water             | RhB   | 0.90                         | 0.773                             | 85.88        | 3.4       |
|                       |       | 0.50                         | 0.460                             | 92.07        | 4.1       |
|                       |       | 0.060                        | 0.054                             | 90.84        | 3.5       |

---

|             |     |       |       |       |     |
|-------------|-----|-------|-------|-------|-----|
|             |     | 0.90  | 0.846 | 94.62 | 3.4 |
|             | CV  | 0.50  | 0.465 | 93.00 | 2.3 |
|             |     | 0.060 | 0.052 | 86.67 | 1.7 |
|             |     | 0.90  | 0.892 | 99.11 | 4.2 |
|             | MLB | 0.50  | 0.457 | 91.40 | 2.5 |
|             |     | 0.060 | 0.057 | 95.86 | 2.9 |
|             |     | 0.90  | 0.857 | 95.25 | 4.0 |
| River water | RhB | 0.50  | 0.453 | 90.60 | 4.1 |
|             |     | 0.060 | 0.053 | 88.33 | 3.7 |
|             |     | 0.90  | 0.826 | 91.78 | 3.1 |
|             | CV  | 0.50  | 0.484 | 96.80 | 3.8 |
|             |     | 0.060 | 0.053 | 88.34 | 3.9 |

---
